# Supplementary material
Source: PubMed Central journal article supplement (PMC10395006)

A.

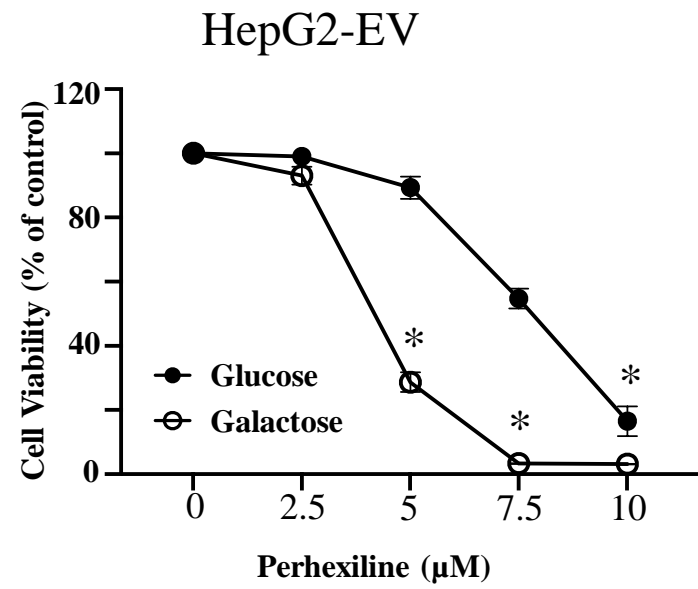

HepG2-2D6

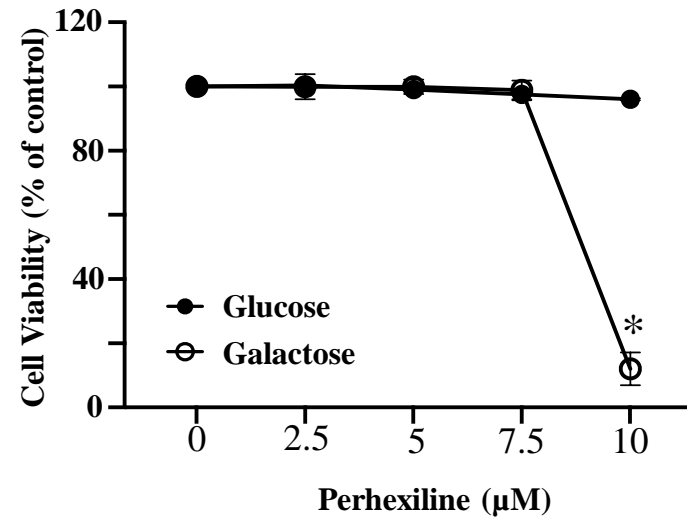

B.

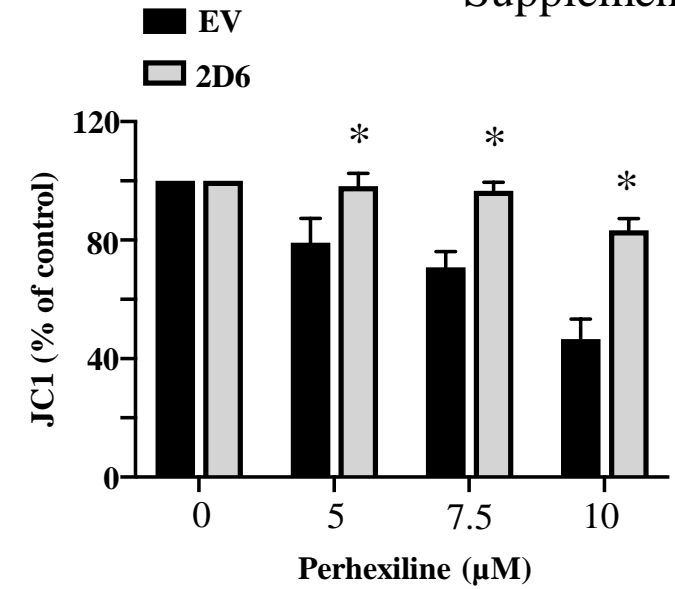

C.

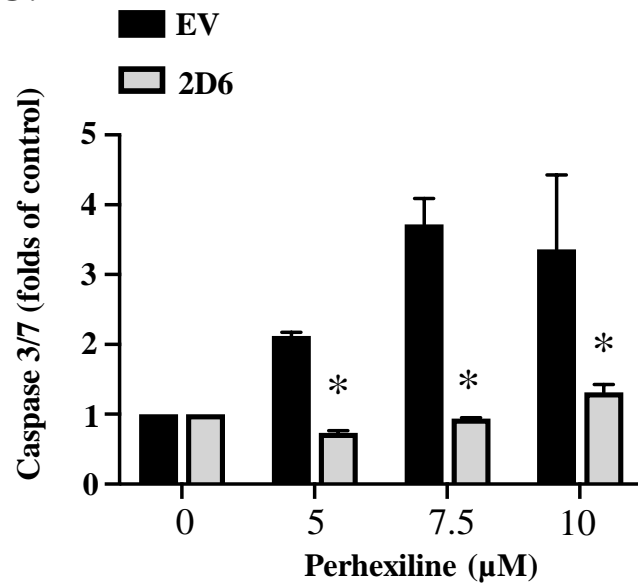

D.

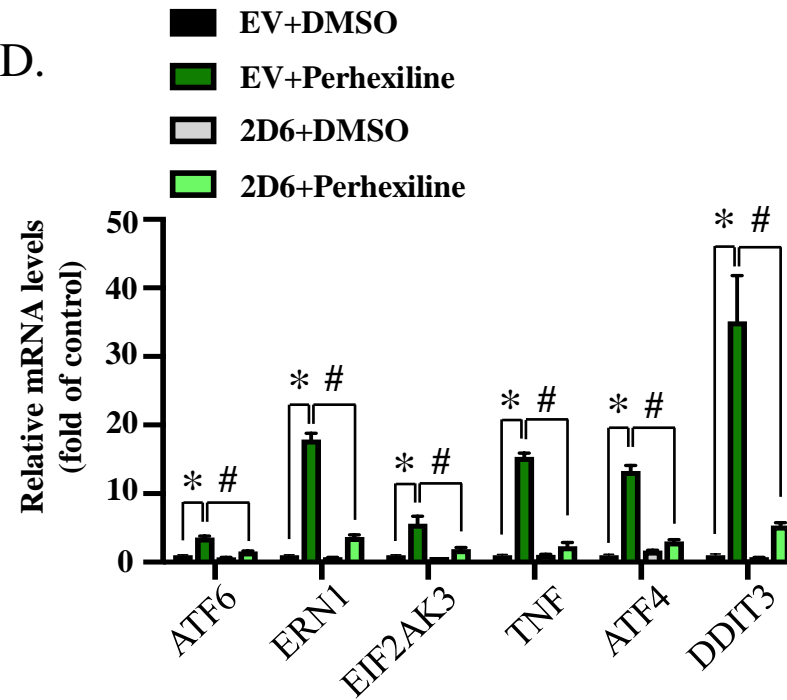

E.

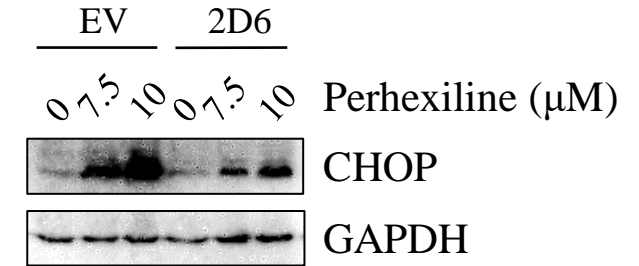

A.

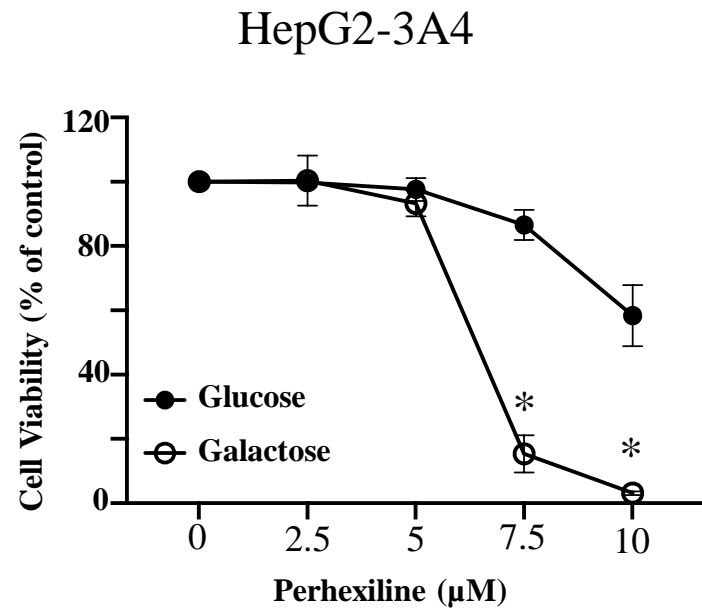

B.

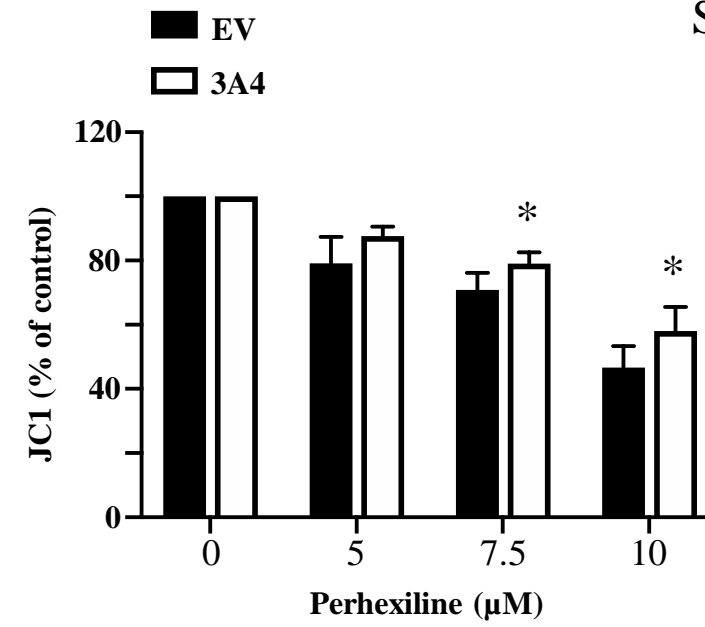

C.

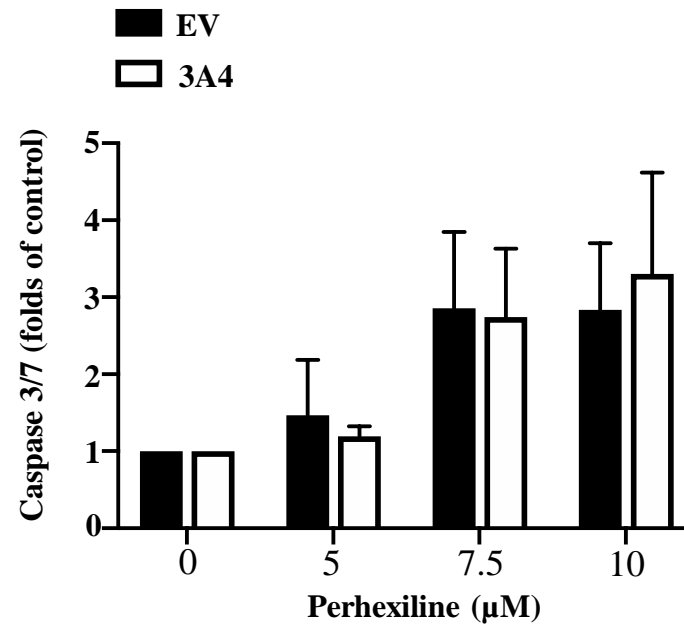

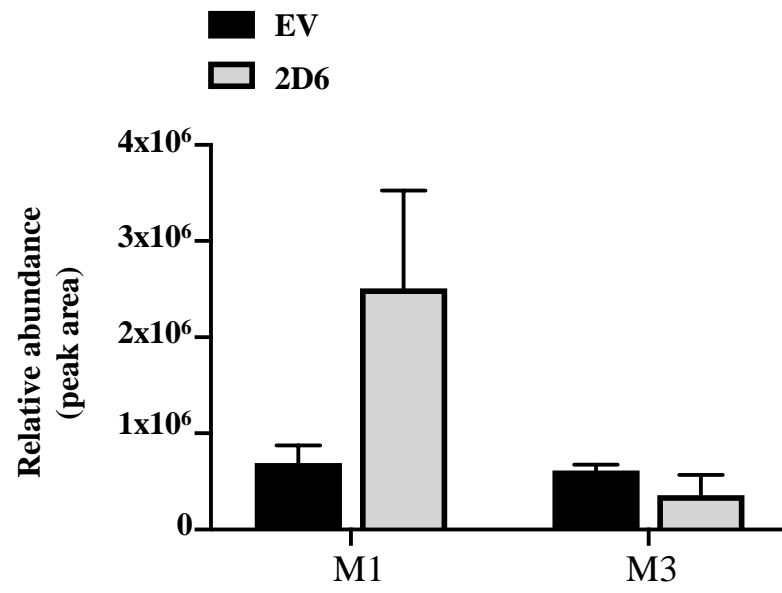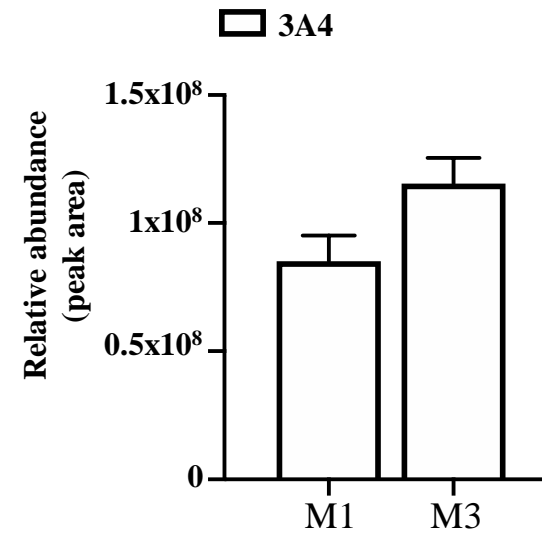

A.

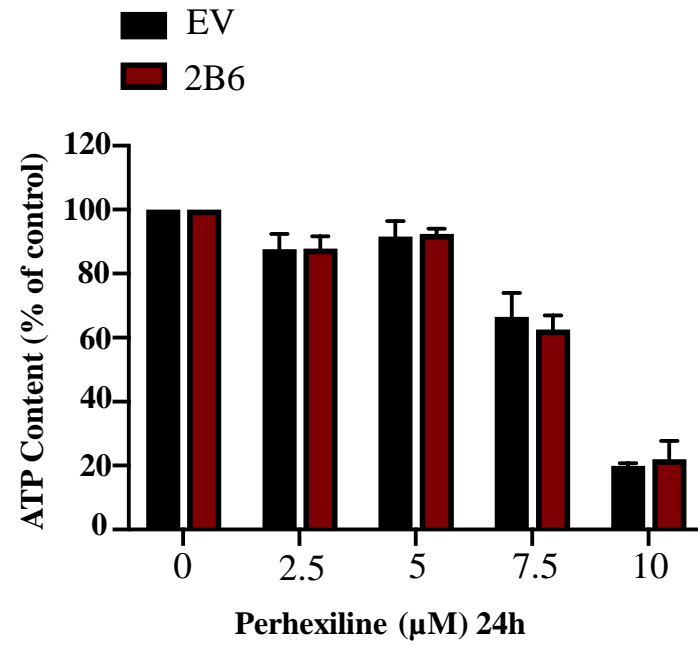

B.

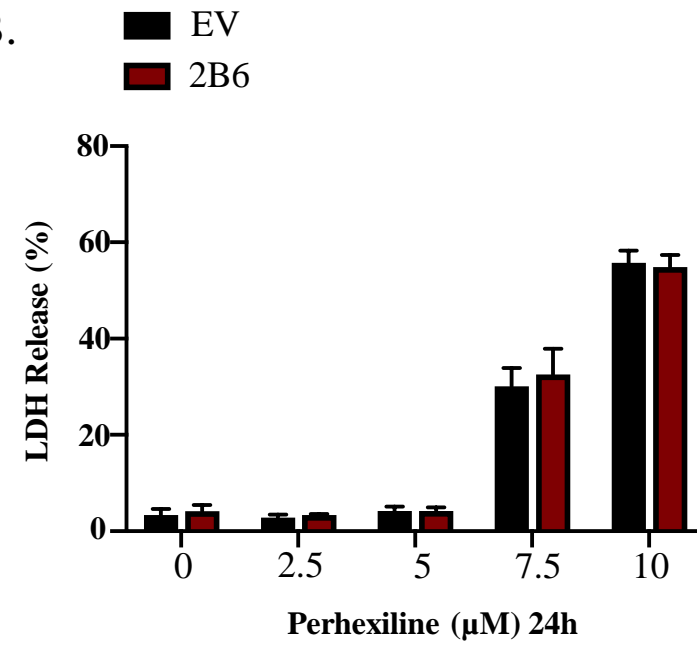

Supplement: NIHMS1874595-supplement-Supplementary_files.pdf [file NIHMS1874595-supplement-Supplementary_files.pdf]
